# Supplementary material for: Development of Prediction Models for Drug-Induced Cholestasis, Cirrhosis, Hepatitis, and Steatosis Based on Drug and Drug Metabolite Structures
Source: Front Pharmacol. 2020 Feb 14;11:67. doi: 10.3389/fphar.2020.00067 (PMC7034408; doi:10.3389/fphar.2020.00067)
Supplement: Supplementary file 2 [file DataSheet_2.xlsx]

## Sheet: Contents
	Supplementary Tables
	Contents
	Table S1. Chemical space shift between DILI-positive drugs and DILI-positive drug metabolites
	Table S2. Privileged substructures in DILI-positive (drug-induced cholestasis)
	Table S3. Privileged substructures in DILI-positive (drug-induced cirrhosis)
	Table S4. Privileged substructures in DILI-positive (drug-induced hepatitis)
	Table S5. Privileged substructures in DILI-positive (drug-induced steatosis)
	Table S6. Privileged substructures in DILI-positive (drug metabolite-induced cholestasis)
	Table S7. Privileged substructures in DILI-positive (drug metabolite-induced cirrhosis)
	Table S8. Privileged substructures in DILI-positive (drug metabolite-induced hepatitis)
	Table S9. Privileged substructures in DILI-positive (drug metabolite-induced steatosis)
	Table S10. Increased and decreased substructures due to drug metabolism (cholestasis)
	Table S11. Increased and decreased substructures due to drug metabolism (cirrhosis)
	Table S12. Increased and decreased substructures due to drug metabolism (hepatitis)
	Table S13. Increased and decreased substructures due to drug metabolism (steatosis)
	Glossary
	*Ntox: The number of the fragment in DILI-positive data set
	*Nno: The number of the fragment in DILI-negative data set
	*Ftox: The frequency of the fragment in DILI-positive data set
	*Fnox: The frequency of the fragment in DILI-negative data set
	*Ntox, met: The number of the fragment in DILI-positive data set of drug-metabolites
	*Ntox, drug: The number of the fragment in DILI-positive data set of drugs
	*Nno, met: The number of the fragment in DILI-negative data set of drug-metabolites
	*Nno, drug: The number of the fragment in DILI-negative data set of drugs
	*Ftox, met: The frequency of the fragment in DILI-positive data set of drug-metabolites
	*Ftox, drug: The frequency of the fragment in DILI-positive data set of drugs
	*Fno, met: The frequency of the fragment in DILI-negative data set of drug-metabolites
	*Fno, drug: The frequency of the fragment in DILI-negative data set of drugs
	*VN, tox = Ntox, met - Ntox, drug
	*VN, no = Nno, met - Nno, drug
	*VF, tox = Ftox, met - Ftox, drug
	*VF, no = Fno, met - Fno, drug

## Sheet: TableS1
Table S1. Chemical space shift between DILI-positive drugs and DILI-positive drug metabolites
LogP	DILI-positive drugs		DILI-positive drug metabolites		Increase of logP mean*	Independent t-test (p-value)	Equal-variance test (p-value)
	Mean	Standard deviation	Mean	Standard deviation			Bartlett	Fligner	Levene
Cholestasis	2.209	2.208	3.03	1.33	0.821	< 0.01	< 0.01	< 0.01	< 0.01
Cirrhosis	2.568	2.335	3.26	1.308	0.692	0.07	< 0.01	< 0.01	< 0.01
Hepatitis	2.521	2.15	2.933	1.484	0.412	0.052	< 0.01	< 0.01	< 0.01
Steatosis	2.648	2.217	3.163	1.292	0.515	0.106	< 0.01	< 0.01	< 0.01
*Increase of logP mean was calculated by substracting mean logP of DILI-positive drugs from that of DILI-positive drug metabolites

## Sheet: TableS2
Table S2. Privileged substructures in DILI-positive (drug-induced cholestasis)
Structure	Ntox	Nno	Ftox	Fno	Bit	Daylight SMARTS
	13	3	2.258	0.293	1928	[#6]F
	6	1	2.383	0.223	333	[#6]-[#8]-c(:c(-[#6]):c):c(-[#6]):c
	5	0	2.78	0	680	[#6]-[#6](-[#6])-[#6]-[#6](-[#6])-[#6]

## Sheet: TableS3
Table S3. Privileged substructures in DILI-positive (drug-induced cirrhosis)
Structure	Ntox	Nno	Ftox	Fno	Bit	Daylight SMARTS
	5	1	2.695	0.2413	1160	c:c:c(:c:c)-c(:c):c
	6	2	2.426	0.362	1724	[#6]-c(:c):c(:n:c):c(:c):c
	4	0	2.587	0	407	[#6]-[#6]-[#7](-[#6]-[#6])-[#6](-[#6])=[#6] or [#6]-[#6]-[#7](-[#6]-[#6])-c(:c):c

## Sheet: TableS4
Table S4. Privileged substructures in DILI-positive (drug-induced hepatitis)
Structure	Ntox	Nno	Ftox	Fno	Bit	Daylight SMARTS
	29	3	1.586	0.219	1928	[#6]F
	24	6	1.4	0.467	1683	[#6]Cl
	20	5	1.4	0.467	715	[#6]-[#8-]
	18	1	1.658	0.123	1160	c:c:c(:c:c)-c(:c):c
	18	3	1.5	0.333	310	[#6]-[#6]-[#6]-1=[#6]-[#6]=[#6](-[#6])-[#6]=[#6]-1
	16	3	1.474	0.368	718	[#6]-[#8]-[#6]-1=[#6]-[#6]=[#6](-[#6])-[#6]=[#6]-1
	11	0	1.75	0	680	[#6]-[#6](-[#6])-[#6]-[#6](-[#6])-[#6]
	10	0	1.75	0	407	[#6]-[#6]-[#7](-[#6]-[#6])-[#6](-[#6])=[#6] or [#6]-[#6]-[#7](-[#6]-[#6])-c(:c):c
	10	0	1.75	0	1164	[#6]-c(:c):n:n:c

## Sheet: TableS5
Table S5. Privileged substructures in DILI-positive (drug-induced steatosis)
Structure	Ntox	Nno	Ftox	Fno	Bit	Daylight SMARTS
	10	3	2.115	0.363	1928	[#6]F
	10	3	2.115	0.363	718	[#6]-[#8]-[#6]-1=[#6]-[#6]=[#6](-[#6])-[#6]=[#6]-1
	9	3	2.063	0.393	310	[#6]-[#6]-[#6]-1=[#6]-[#6]=[#6](-[#6])-[#6]=[#6]-1
	6	0	2.75	0	680	[#6]-[#6](-[#6])-[#6]-[#6](-[#6])-[#6]
	6	0	2.75	0	407	[#6]-[#6]-[#7](-[#6]-[#6])-[#6](-[#6])=[#6] or [#6]-[#6]-[#7](-[#6]-[#6])-c(:c):c

## Sheet: TableS6
Table S6. Privileged substructures in DILI-positive (drug metabolite-induced cholestasis)
Structure	Ntox	Nno	Ftox	Fno	Bit	Daylight SMARTS
	11	0	2.556	0	680	[#6]-[#6](-[#6])-[#6]-[#6](-[#6])-[#6]
	10	1	2.323	0.149	674	[#6]C#C
	9	1	2.3	0.164	1160	c:c:c(:c:c)-c(:c):c
	10	0	2.556	0	787	[#6]-[#6]-1=[#6]-[#6]=[#7]-[#6](-[#6])=[#6]-1

## Sheet: TableS7
Table S7. Privileged substructures in DILI-positive (drug metabolite-induced cirrhosis)
Structure	Ntox	Nno	Ftox	Fno	Bit	Daylight SMARTS
	18	3	2.445	0.22	675	[#6]-[#16]-[#6]
	16	0	2.853	0	407	[#6]-[#6]-[#7](-[#6]-[#6])-[#6](-[#6])=[#6] or [#6]-[#6]-[#7](-[#6]-[#6])-c(:c):c
	11	0	2.853	0	927	c:c(:c)\[#7]=c(:\c):c
	10	1	2.594	0.14	74	c:c(:c)\[#7]=c(:\c):c
	9	0	2.853	0	680	[#6]-[#6](-[#6])-[#6]-[#6](-[#6])-[#6]
	9	1	2.568	0.154	1160	c:c:c(:c:c)-c(:c):c
	8	0	2.853	0	1982	[#6]-[#7]-c(:c:c):c(-[#6]):c

## Sheet: TableS8
Table S8. Privileged substructures in DILI-positive (drug metabolite-induced hepatitis)
Structure	Ntox	Nno	Ftox	Fno	Bit	Daylight SMARTS
	47	7	1.463	0.32	1683	[#6]Cl
	34	3	1.545	0.2	1983	[#6]F
	28	1	1.623	0.085	1160	c:c:c(:c:c)-c(:c):c
	32	5	1.454	0.334	322	[#6]-[#8]-c(:c:c):c:c
	22	0	1.681	0	680	[#6]-[#6](-[#6])-[#6]-[#6](-[#6])-[#6]
	22	3	1.479	0.296	675	[#6]-[#16]-[#6]
	20	0	1.681	0	407	[#6]-[#6]-[#7](-[#6]-[#6])-[#6](-[#6])=[#6] or [#6]-[#6]-[#7](-[#6]-[#6])-c(:c):c

## Sheet: TableS9
Table S9. Privileged substructures in DILI-positive (drug metabolite-induced steatosis)
Structure	Ntox	Nno	Ftox	Fno	Bit	Daylight SMARTS
	23	4	1.958	0.262	13	[#6]-[#6]-[#6]-[#8]-[#6]
	11	0	2.299	0	440	[#6]-c(:c):c(:c:c)-[#7]=[#6]
	12	1	2.122	0.136	74	c:c(:c)\[#7]=c(:\c):c
	16	0	2.299	0	407	[#6]-[#6]-[#7](-[#6]-[#6])-[#6](-[#6])=[#6] or [#6]-[#6]-[#7](-[#6]-[#6])-c(:c):c
	11	0	2.299	0	680	[#6]-[#6](-[#6])-[#6]-[#6](-[#6])-[#6]

[truncated: 4 more sheets: TableS10, TableS11, TableS12, TableS13]
